# Supplementary material for: The impact of counterion on the metastable state properties of nitrosyl ruthenium complexes
Source: Royal Society of Chemistry journal article supplement (doi:10.1039/d0nj04436a), 2020-01-01
Supplement: d0nj04436a1.pdf [file d0nj04436a1.pdf]

## Supporting information

### The impact of counterion on metastable states properties in nitrosyl ruthenium complexes

Artem A. Mikhailov<sup>\*a</sup>, Vladislav Yu. Komarov<sup>a</sup>, Aleksandr S. Sukhikh<sup>a</sup>, Denis P. Pishchur<sup>a</sup>, Dominik Schaniel<sup>b</sup> and Gennadiy A. Kostin<sup>a</sup>

<sup>a</sup> Nikolaev Institute of Inorganic Chemistry, Siberian Branch of the Russian Academy of Sciences, 3 Acad. Lavrentiev Avenue, Novosibirsk 630090, Russian Federation

<sup>b</sup> Université de Lorraine, CNRS, CRM2, UMR 7036, Nancy 54000, France

Email: amikhailov@niic.nsc.ru

**Table S1.** Experimental and refinement details.

| Complex                                     | [RuNO(NH <sub>3</sub> ) <sub>4</sub> F][PtCl <sub>6</sub> ]      | [RuNO(NH <sub>3</sub> ) <sub>4</sub> F][PdCl <sub>4</sub> ]      | [RuNO(NH <sub>3</sub> ) <sub>4</sub> F][PtCl <sub>4</sub> ]      | [RuNO(NH <sub>3</sub> ) <sub>4</sub> F](ClO <sub>4</sub> ) <sub>2</sub> |
|---------------------------------------------|------------------------------------------------------------------|------------------------------------------------------------------|------------------------------------------------------------------|-------------------------------------------------------------------------|
| Empirical formula                           | Cl <sub>6</sub> FH <sub>12</sub> N <sub>5</sub> OPtRu            | Cl <sub>4</sub> FH <sub>12</sub> N <sub>5</sub> OPdRu            | Cl <sub>4</sub> H <sub>12</sub> FN <sub>5</sub> OPTRu            | Cl <sub>2</sub> H <sub>12</sub> FN <sub>5</sub> O <sub>9</sub> Ru       |
| Formula weight                              | 626.01                                                           | 466.42                                                           | 555.11                                                           | 417.12                                                                  |
| Temperature/K                               | 150(2)                                                           | 150(2)                                                           | 150(2)                                                           | 150(2)                                                                  |
| Crystal system                              | orthorhombic                                                     | orthorhombic                                                     | orthorhombic                                                     | triclinic                                                               |
| Space group                                 | P2 <sub>1</sub> 2 <sub>1</sub> 2 <sub>1</sub>                    | Cmc2 <sub>1</sub>                                                | Cmc2 <sub>1</sub>                                                | p $\bar{1}$                                                             |
| a/Å                                         | 7.0583(5)                                                        | 8.1541(3)                                                        | 8.1354(13)                                                       | 8.0038(5)                                                               |
| b/Å                                         | 8.7624(6)                                                        | 17.4696(10)                                                      | 17.5637(18)                                                      | 11.8995(5)                                                              |
| c/Å                                         | 22.0421(14)                                                      | 8.1730(5)                                                        | 8.1749(8)                                                        | 13.8054(8)                                                              |
| $\alpha$ /°                                 | 90                                                               | 90                                                               | 90                                                               | 70.720(2)                                                               |
| $\beta$ /°                                  | 90                                                               | 90                                                               | 90                                                               | 86.091(2)                                                               |
| $\gamma$ /°                                 | 90                                                               | 90                                                               | 90                                                               | 88.040(2)                                                               |
| Volume/Å <sup>3</sup>                       | 1363.25(16)                                                      | 1164.23(11)                                                      | 1168.1(2)                                                        | 1238.12(12)                                                             |
| Z                                           | 4                                                                | 4                                                                | 4                                                                | 4                                                                       |
| $\rho_{\text{calc}}$ /g/cm <sup>3</sup>     | 3.050                                                            | 2.661                                                            | 3.157                                                            | 2.238                                                                   |
| $\mu$ /mm <sup>-1</sup>                     | 12.528                                                           | 3.745                                                            | 14.157                                                           | 1.759                                                                   |
| F(000)                                      | 1152.0                                                           | 888.0                                                            | 1016.0                                                           | 824.0                                                                   |
| Crystal size/mm <sup>3</sup>                | 0.07 × 0.03 × 0.03                                               | 0.17 × 0.08 × 0.02                                               | 0.11 × 0.08 × 0.03                                               | 0.1 × 0.08 × 0.04                                                       |
| Radiation                                   | MoK $\alpha$ ( $\lambda$ = 0.71073)                                     |
| 2 $\theta$ range for data collection/°      | 3.696 to 61.3                                                    | 4.664 to 59.27                                                   | 4.638 to 52.69                                                   | 3.936 to 66.314                                                         |
| Index ranges                                | -9 ≤ h ≤ 9,<br>-12 ≤ k ≤ 12,<br>-31 ≤ l ≤ 30                     | -11 ≤ h ≤ 10,<br>-24 ≤ k ≤ 23,<br>-11 ≤ l ≤ 11                   | -10 ≤ h ≤ 9,<br>-21 ≤ k ≤ 20,<br>-10 ≤ l ≤ 10                    | -12 ≤ h ≤ 12,<br>-18 ≤ k ≤ 18,<br>-20 ≤ l ≤ 21                          |
| Reflections collected                       | 44736                                                            | 11486                                                            | 2669                                                             | 24099                                                                   |
| Independent reflections                     | 4053 [R <sub>int</sub> = 0.0534,<br>R <sub>sigma</sub> = 0.0340] | 1750 [R <sub>int</sub> = 0.0400,<br>R <sub>sigma</sub> = 0.0290] | 1253 [R <sub>int</sub> = 0.0465,<br>R <sub>sigma</sub> = 0.0880] | 24099 [R <sub>int</sub> = 0.0373,<br>R <sub>sigma</sub> = 0.0448]       |
| Data/restraints/parameters                  | 4053/0/137                                                       | 1750/1/73                                                        | 1253/7/72                                                        | 24099/0/334                                                             |
| Goodness-of-fit on F <sup>2</sup>           | 1.056                                                            | 1.053                                                            | 0.833                                                            | 1.080                                                                   |
| Final R indexes [I ≥ 2 $\sigma$ (I)]        | R <sub>1</sub> = 0.0251,<br>wR <sub>2</sub> = 0.0340             | R <sub>1</sub> = 0.0200,<br>wR <sub>2</sub> = 0.0359             | R <sub>1</sub> = 0.0336,<br>wR <sub>2</sub> = 0.0629             | R <sub>1</sub> = 0.0385,<br>wR <sub>2</sub> = 0.0988                    |
| Final R indexes [all data]                  | R <sub>1</sub> = 0.0329,<br>wR <sub>2</sub> = 0.0359             | R <sub>1</sub> = 0.0220,<br>wR <sub>2</sub> = 0.0371             | R <sub>1</sub> = 0.0444,<br>wR <sub>2</sub> = 0.0685             | R <sub>1</sub> = 0.0586,<br>wR <sub>2</sub> = 0.1088                    |
| Largest diff. peak/hole / e Å <sup>-3</sup> | 1.08/-1.78                                                       | 0.41/-0.41                                                       | 1.23/-1.33                                                       | 0.81/-1.01                                                              |
| Flack parameter                             | -0.011(3)                                                        | -0.07(3)                                                         | 0.020(12)                                                        | -                                                                       |

**Table S2.** Selected bond lengths (Å) in obtained complexes.

| Distance/complex      |          |                       |          |                       |          |
|-----------------------|----------|-----------------------|----------|-----------------------|----------|
| A[PtCl <sub>4</sub> ] |          | A[PdCl <sub>4</sub> ] |          | A[PtCl <sub>6</sub> ] |          |
| Pt-Cl1                | 2.310(6) | Pd-Cl1                | 2.312(1) | Pt-Cl1                | 2.330(1) |
| Pt-Cl2                | 2.302(2) | Pd-Cl2                | 2.298(1) | Pt-Cl2                | 2.314(2) |
| Pt-Cl3                | 3.339(6) | Pd-Cl3                | 2.344(2) | Pt-Cl3                | 2.321(1) |
| Pt-Cl4                | 2.302(2) | Pd-Cl4                | 2.298(1) | Pt-Cl4                | 2.328(2) |
|                       |          |                       |          | Pt-Cl5                | 2.323(2) |
|                       |          |                       |          | Pt-Cl6                | 2.313(2) |

**Table S3.** Bond lengths (Å) in the ClO<sub>4</sub><sup>-</sup> anions of the A(ClO<sub>4</sub>)<sub>2</sub>.

| Bond/ Distance |          |         |          |         |          |         |          |
|----------------|----------|---------|----------|---------|----------|---------|----------|
| Cl1-O3         | 1.427(2) | Cl2-O7  | 1.449(3) | Cl3-O11 | 1.438(3) | Cl4-O15 | 1.409(2) |
| Cl1-O4         | 1.441(3) | Cl2-O8  | 1.434(2) | Cl3-O12 | 1.432(3) | Cl4-O16 | 1.438(3) |
| Cl1-O5         | 1.433(3) | Cl2-O9  | 1.426(3) | Cl3-O13 | 1.434(3) | Cl4-O17 | 1.440(3) |
| Cl1-O6         | 1.449(3) | Cl2-O10 | 1.428(4) | Cl3-O14 | 1.443(2) | Cl4-O18 | 1.441(3) |

**Table S4.** Found hydrogen bond lengths (Å) and angles (°).

| Distance, angle/complex           |       |       |                       |       |       |
|-----------------------------------|-------|-------|-----------------------|-------|-------|
| A[PdCl <sub>4</sub> ]             |       |       | A[PtCl <sub>4</sub> ] |       |       |
| N1-H...Cl2                        | 2.844 | 112.0 | N1-H...Cl2            | 2.534 | 156.9 |
| N1-H...Cl3                        | 2.526 | 171.6 | N1-H...Cl2            | 2.813 | 119.7 |
| N1-H...Cl2                        | 2.528 | 151.3 | N1-H...Cl3            | 2.614 | 163.1 |
| N3-H...Cl2                        | 2.804 | 145.8 | N3-H...Cl1            | 2.572 | 158.3 |
| N3-H...Cl3                        | 2.637 | 138.5 | N3-H...Cl2            | 2.854 | 121.7 |
| N3-H...Cl2                        | 2.908 | 149.8 | N3-H...Cl3            | 2.547 | 159.3 |
| N3-H...Cl1                        | 2.912 | 114.9 | N1-H...F1             | 2.148 | 142.2 |
| N3-H...Cl2                        | 2.458 | 169.9 |                       |       |       |
| N1-H...F1                         | 2.046 | 149.1 |                       |       |       |
| A(ClO <sub>4</sub> ) <sub>2</sub> |       |       | A[PtCl <sub>6</sub> ] |       |       |
| N1-H...O13                        | 2.365 | 128.1 | N1-H...Cl4            | 2.886 | 127.9 |
| N1-H...O7                         | 2.422 | 144.1 | N1-H...Cl6            | 2.649 | 152.9 |
| N1-H...O15                        | 2.484 | 114.3 | N1-H...Cl6            | 2.927 | 122.6 |
| N1-H...O9                         | 2.639 | 117.3 | N1-H...Cl3            | 2.787 | 140.1 |
| N1-H...O14                        | 2.613 | 139.4 | N1-H...Cl2            | 2.759 | 133.1 |
| N1-H...O11                        | 2.617 | 116.8 | N1-H...Cl3            | 2.916 | 126.9 |
| N2-H...O8                         | 2.701 | 134.0 | N1-H...Cl5            | 2.776 | 148.2 |
| N2-H...O7                         | 2.265 | 163.6 | N2-H...Cl1            | 2.774 | 139.2 |
| N2-H...O8                         | 2.243 | 138.4 | N2-H...Cl4            | 2.669 | 152.5 |
| N2-H...O6                         | 2.537 | 132.3 | N2-H...Cl5            | 2.701 | 131.1 |
| N2-H...O3                         | 2.648 | 130.4 | N2-H...Cl5            | 2.433 | 176.4 |
| N2-H...13                         | 2.395 | 116.1 | N3-H...Cl1            | 2.672 | 151.3 |
| N3-H...O6                         | 2.591 | 124.1 | N3-H...Cl2            | 2.515 | 172.4 |
| N3-H...O8                         | 2.463 | 142.1 | N3-H...Cl6            | 2.819 | 126.6 |
| N3-H...O10                        | 2.417 | 145.6 | N4-H...Cl3            | 2.600 | 156.2 |
| N3-H...O4                         | 2.218 | 142.9 | N4-H...Cl2            | 2.884 | 82.9  |

|            |       |       |            |       |       |
|------------|-------|-------|------------|-------|-------|
| N3-H...O18 | 2.652 | 116.3 | N4-H...Cl1 | 2.926 | 101.5 |
| N3-H...O16 | 2.212 | 146.4 | N4-H...Cl6 | 2.530 | 158.5 |
| N4-H...O4  | 2.632 | 132.4 | N4-H...F1  | 2.399 | 114.6 |
| N4-H...O3  | 2.365 | 144.5 |            |       |       |
| N4-H...O18 | 2.317 | 145.3 |            |       |       |
| N4-H...O13 | 2.476 | 110.0 |            |       |       |
| N4-H...O11 | 2.272 | 152.7 |            |       |       |
| N4-H...O13 | 2.535 | 105.7 |            |       |       |
| N6-H...O18 | 2.371 | 166.6 |            |       |       |
| N6-H...O12 | 2.409 | 118.9 |            |       |       |
| N6-H...O16 | 2.130 | 155.3 |            |       |       |
| N7-H...O5  | 2.203 | 150.3 |            |       |       |
| N7-H...O12 | 2.092 | 158.5 |            |       |       |
| N7-H...O6  | 2.173 | 172.6 |            |       |       |
| N7-H...O5  | 2.691 | 121.2 |            |       |       |
| N8-H...O9  | 2.244 | 143.2 |            |       |       |
| N8-H...O12 | 2.631 | 100.6 |            |       |       |
| N8-H...O12 | 2.595 | 103.7 |            |       |       |
| N8-H...O7  | 2.208 | 171.9 |            |       |       |
| N8-H...O6  | 2.377 | 145.2 |            |       |       |
| N8-H...O4  | 2.344 | 153.3 |            |       |       |
| N9-H...O17 | 2.679 | 119.7 |            |       |       |
| N9-H...O12 | 2.255 | 135.2 |            |       |       |
| N9-H...O7  | 2.523 | 137.8 |            |       |       |
| N9-H...O17 | 2.111 | 164.6 |            |       |       |
| N1-H...F1  | 1.992 | 176.6 |            |       |       |
| N6-H...F2  | 2.160 | 156.0 |            |       |       |
| N9-H...F2  | 2.128 | 159.2 |            |       |       |

**Table S5.** Intermolecular contacts shorter than the sum of the van der Waals radii (contacting atoms are underlined).

| Contact length (Å)/complex   |      |                       |      |                       |      |                       |      |                                     |            |
|------------------------------|------|-----------------------|------|-----------------------|------|-----------------------|------|-------------------------------------|------------|
| A(SiF <sub>6</sub> )         |      | A[PtCl <sub>6</sub> ] |      | A[PdCl <sub>4</sub> ] |      | A[PtCl <sub>4</sub> ] |      | A(ClO <sub>4</sub> ) <sub>2</sub> * |            |
| <u>NO</u> ...NH <sub>3</sub> | 2.66 | <u>NO</u> ...Cl       | 3.12 | <u>NO</u> ...Cl       | 3.19 | <u>NO</u> ...Cl       | 3.17 | <u>NO</u> ...O                      | 2.91; 2.92 |
| <u>NO</u> ...F               | 2.66 | <u>NO</u> ...Cl       | 3.17 | <u>NO</u> ...Cl       | 3.19 | <u>NO</u> ...Cl       | 3.17 | <u>NO</u> ...O                      | 3.04; 3.01 |
| <u>NO</u> ...F               | 2.86 | <u>NO</u> ...Cl       | 3.17 |                       |      | <u>NO</u> ...Cl       | 3.29 | <u>NO</u> ...O                      | 2.94; 3.01 |
| <u>NO</u> ...F               | 2.97 | <u>NO</u> ...Cl       | 3.30 |                       |      | <u>NO</u> ...Cl       | 3.29 | <u>NO</u> ...O                      | 2.97; 3.04 |

\* The values related to the Ru1; Ru2 parts

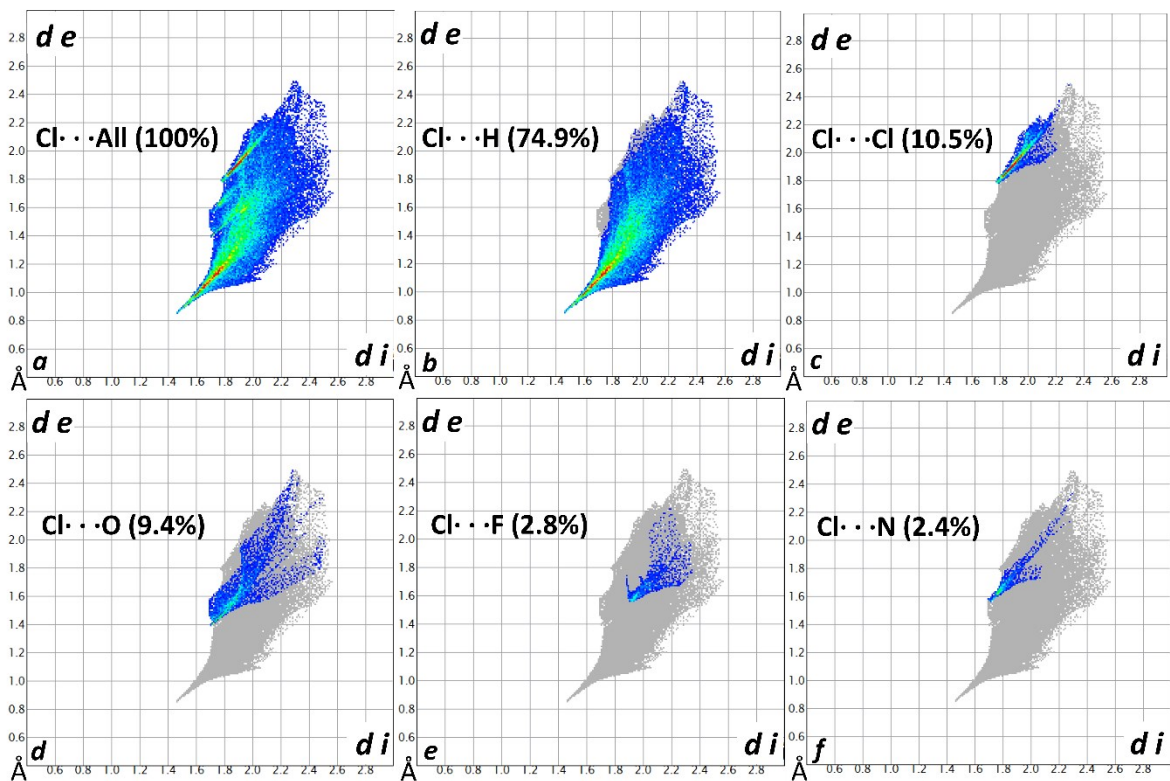

**Fig. S1.** The two-dimensional fingerprints of Hirshfeld surface of the  $[\text{PtCl}_6]^{2-}$  in  $\text{A}[\text{PtCl}_6]$ .

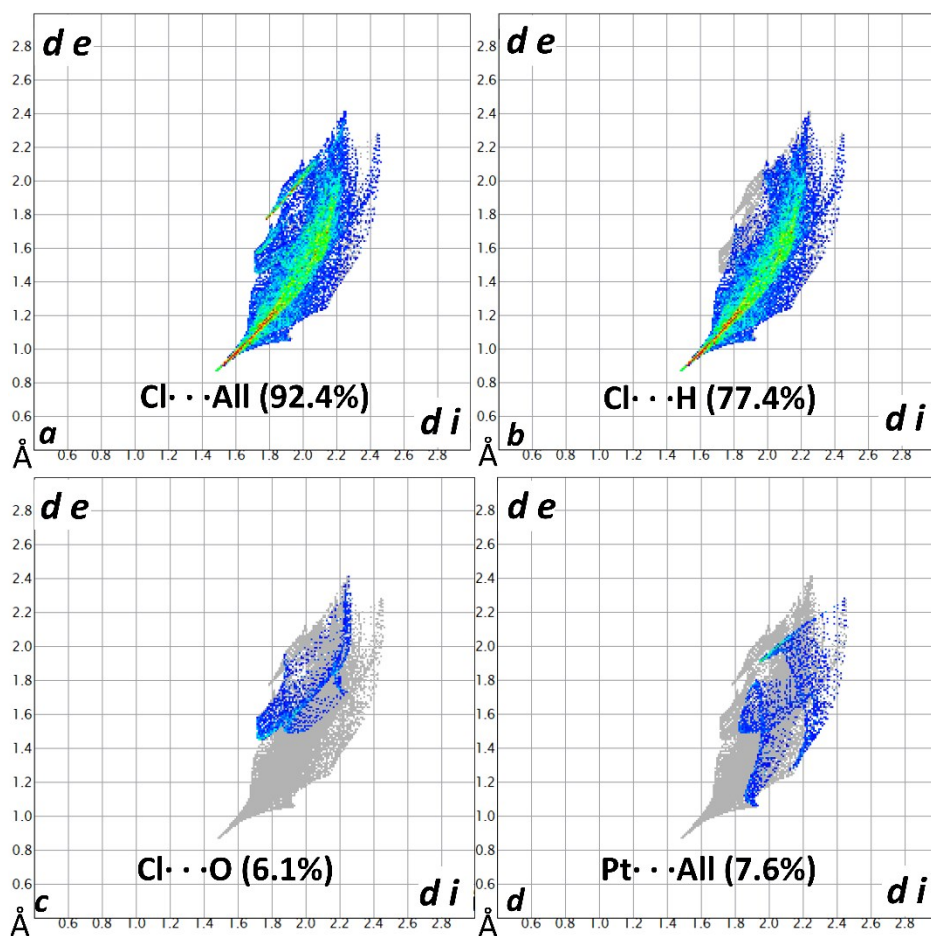

**Fig. S2.** The two-dimensional fingerprints of Hirshfeld surface of the  $[\text{PdCl}_4]^{2-}$  in  $\text{A}[\text{PdCl}_4]$ .

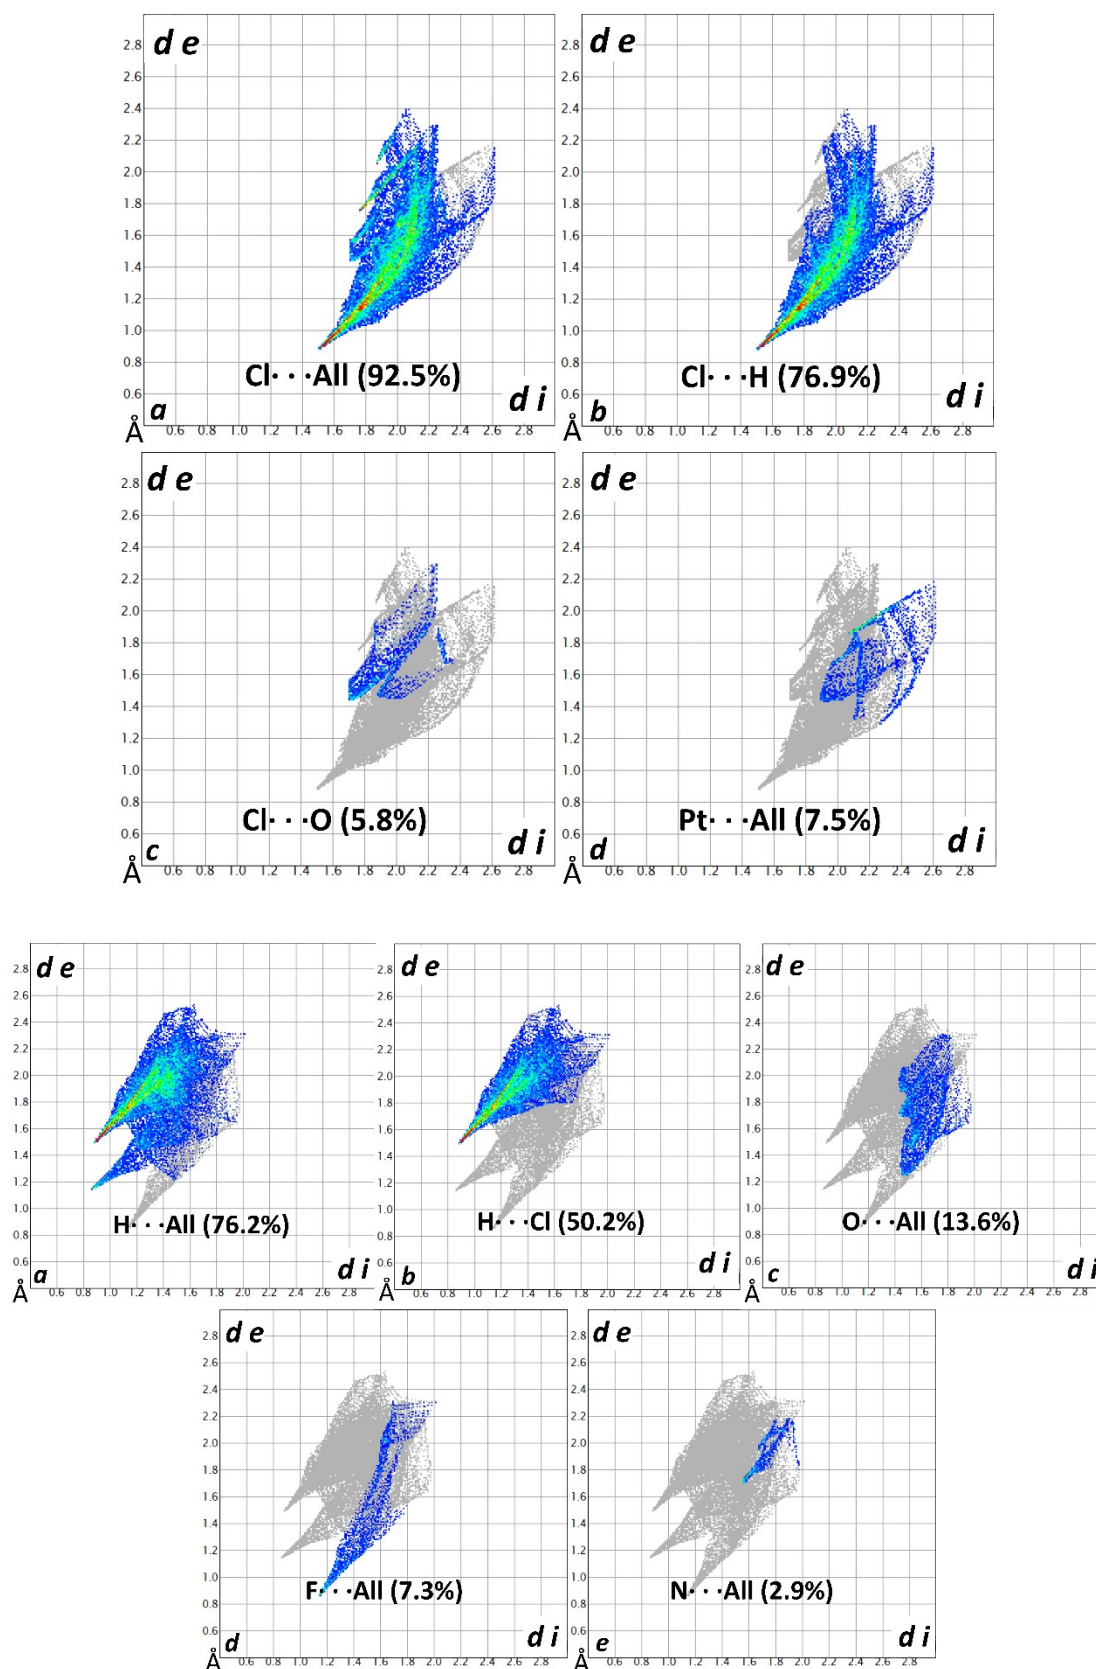

**Fig. S3.** The two-dimensional fingerprints of Hirshfeld surface of the  $[\text{PtCl}_4]^{2-}$  (top panels) and  $[\text{RuNO}(\text{NH}_3)_4\text{F}]^{2+}$  (bottom panels) in  $\text{A}[\text{PtCl}_4]$ .

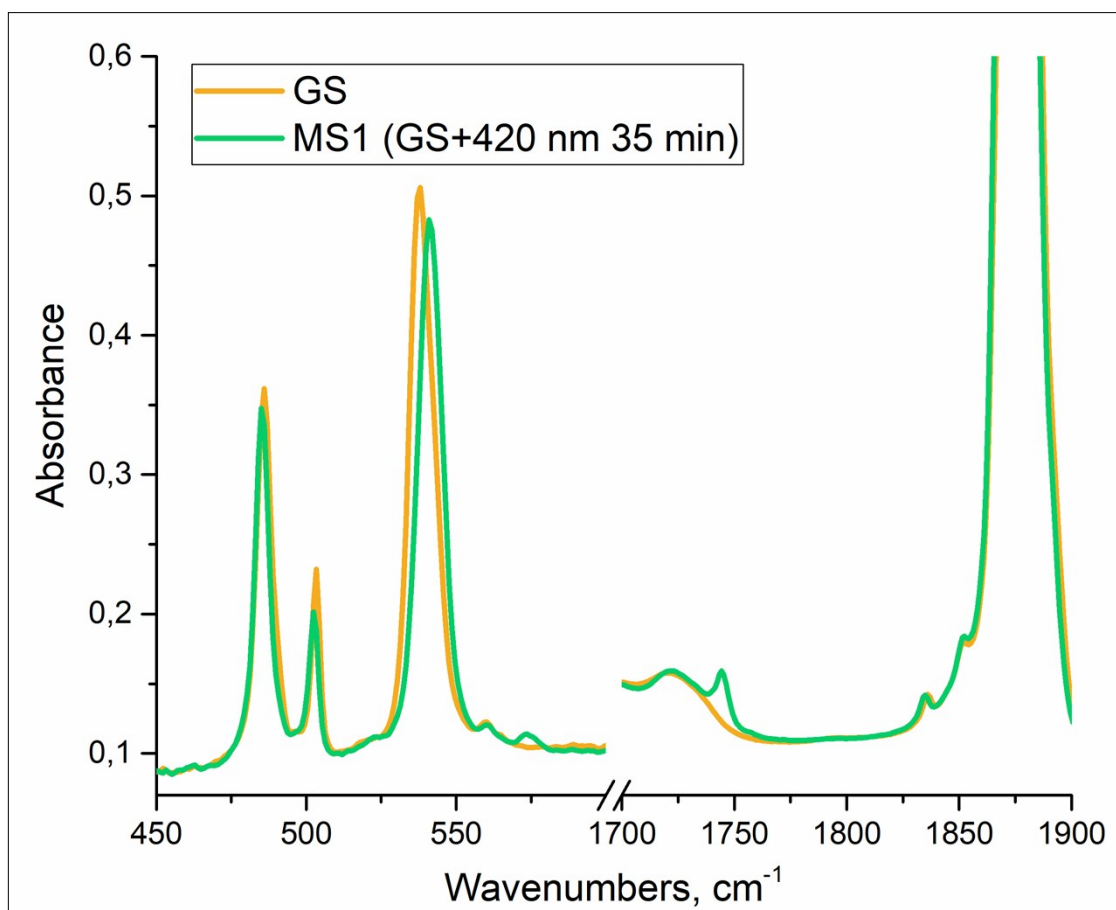

**Fig. S4.** IR-spectrum of  $\text{A}[\text{PtCl}_6]$  at 10 K before (GS, yellow) and after 420 nm irradiation (MS1, green).

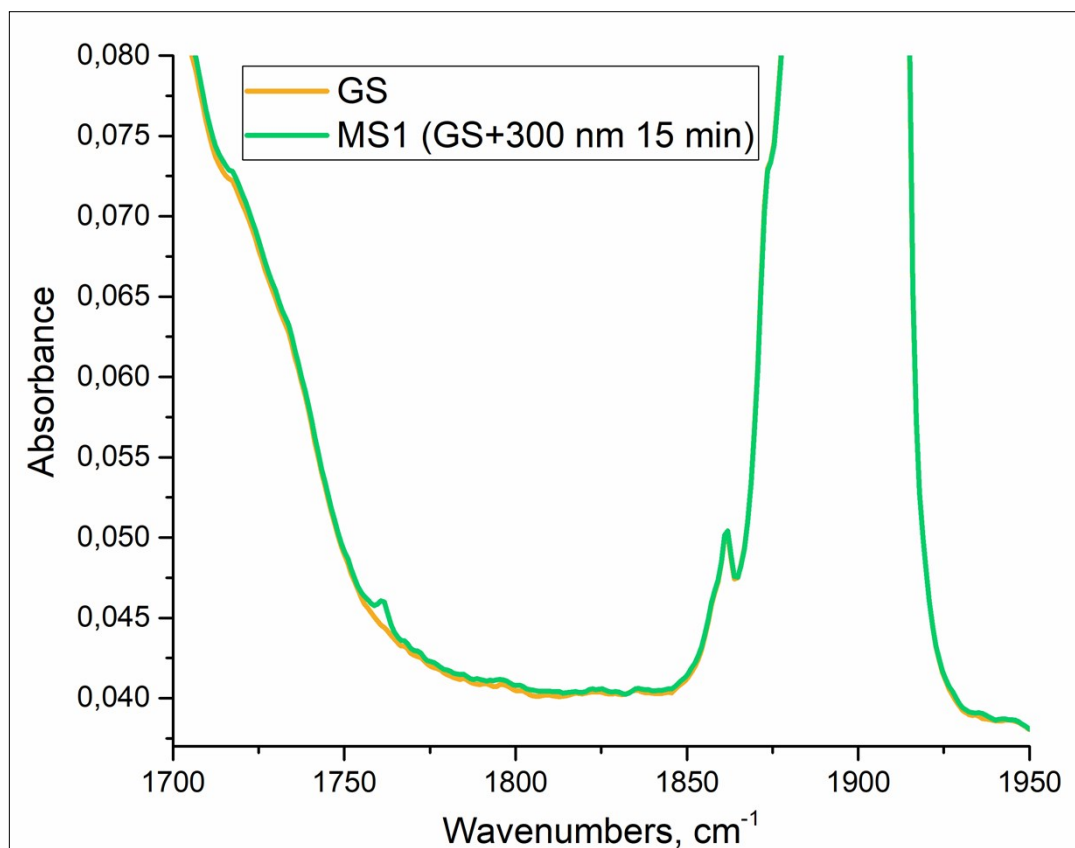

**Fig. S5.** IR-spectrum of  $\text{A}[\text{PtCl}_4]$  at 10 K before (GS, yellow) and after 300 nm irradiation (MS1, green).

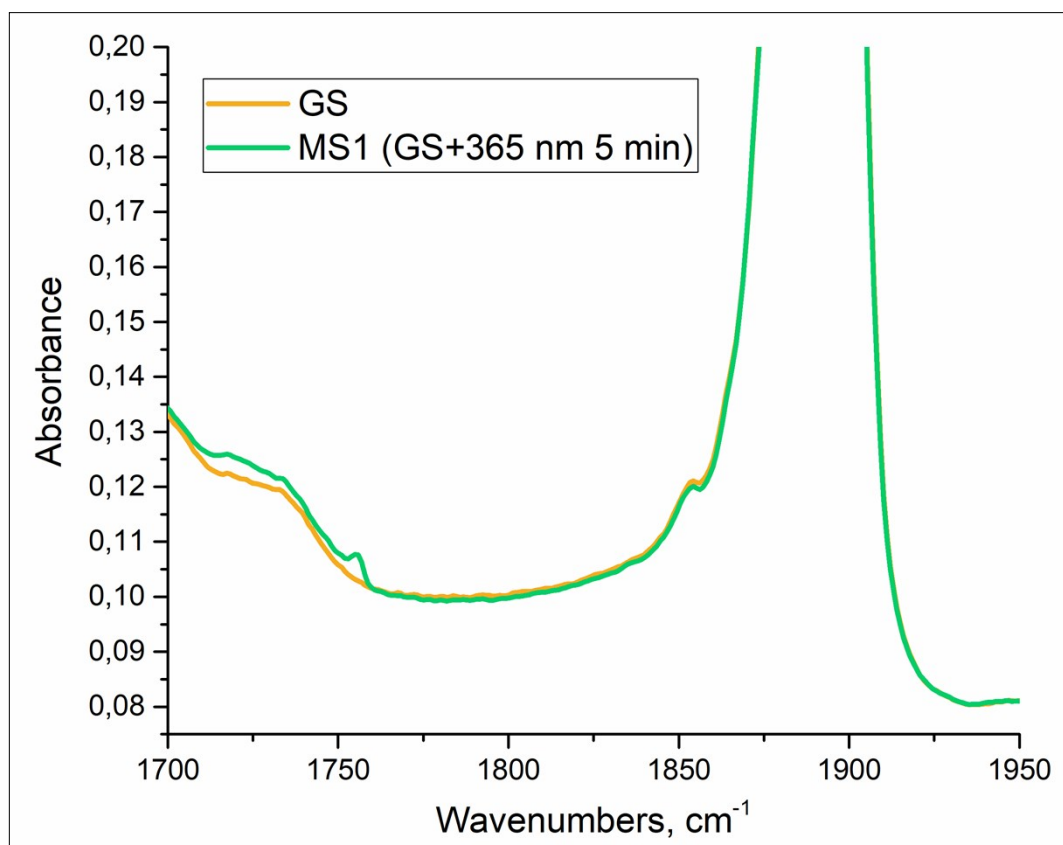

**Fig. S6.** IR-spectrum of  $\text{A}[\text{PdCl}_4]$  at 10 K before (GS, yellow) and after 365 nm irradiation (MS1, green).

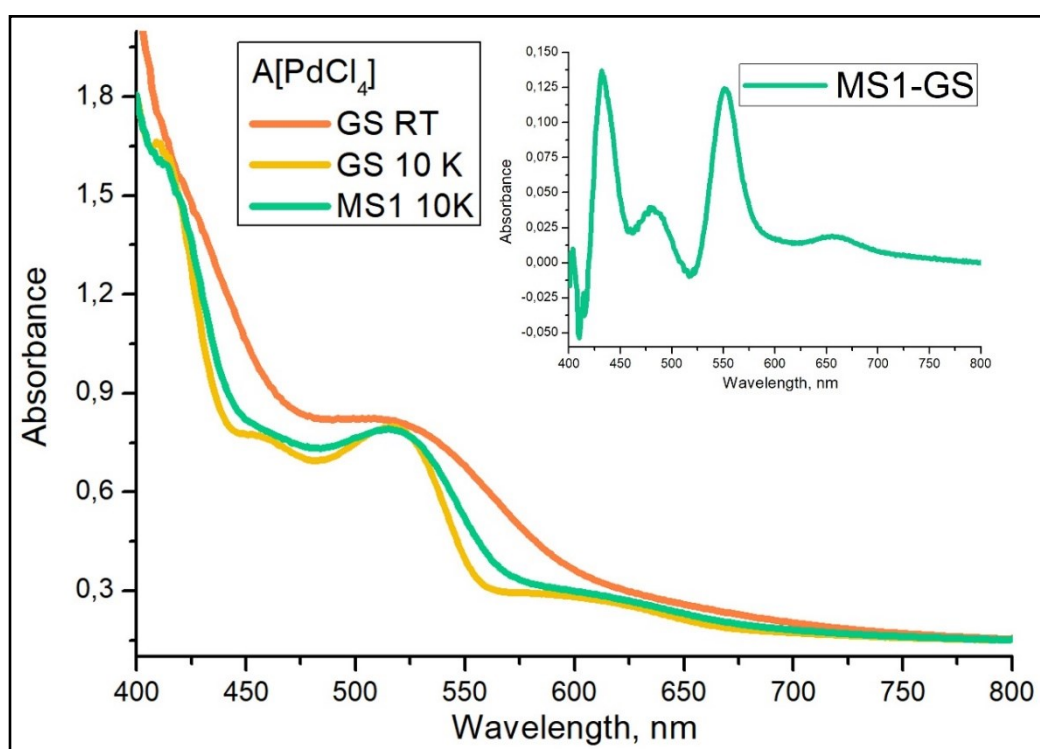

**Fig. S7.** UV/vis spectra of  $\text{A}[\text{PdCl}_4]$  in KBr at room temperature (orange), 10 K (yellow) and after MS1 generation at 10 K (green).



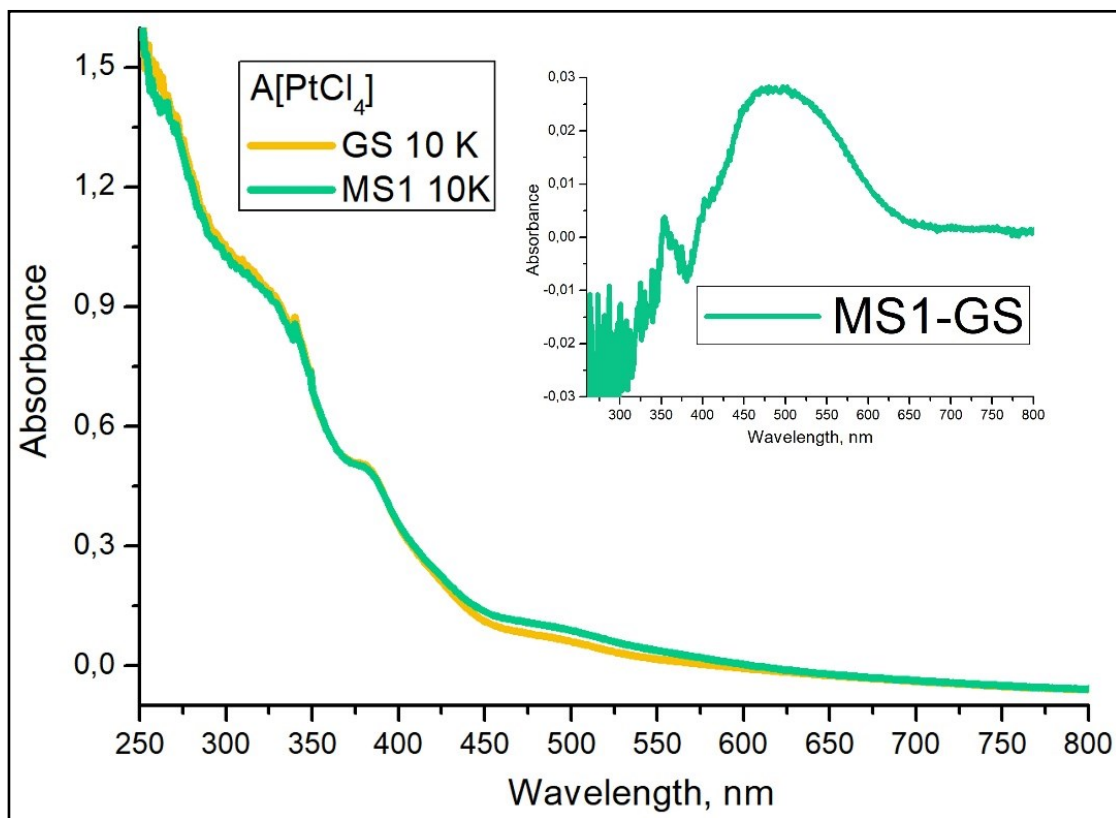

**Fig. S8.** UV/vis spectra of  $A[PtCl_4]$  in KBr at 10 K (yellow) and after MS1 generation at 10 K (green).

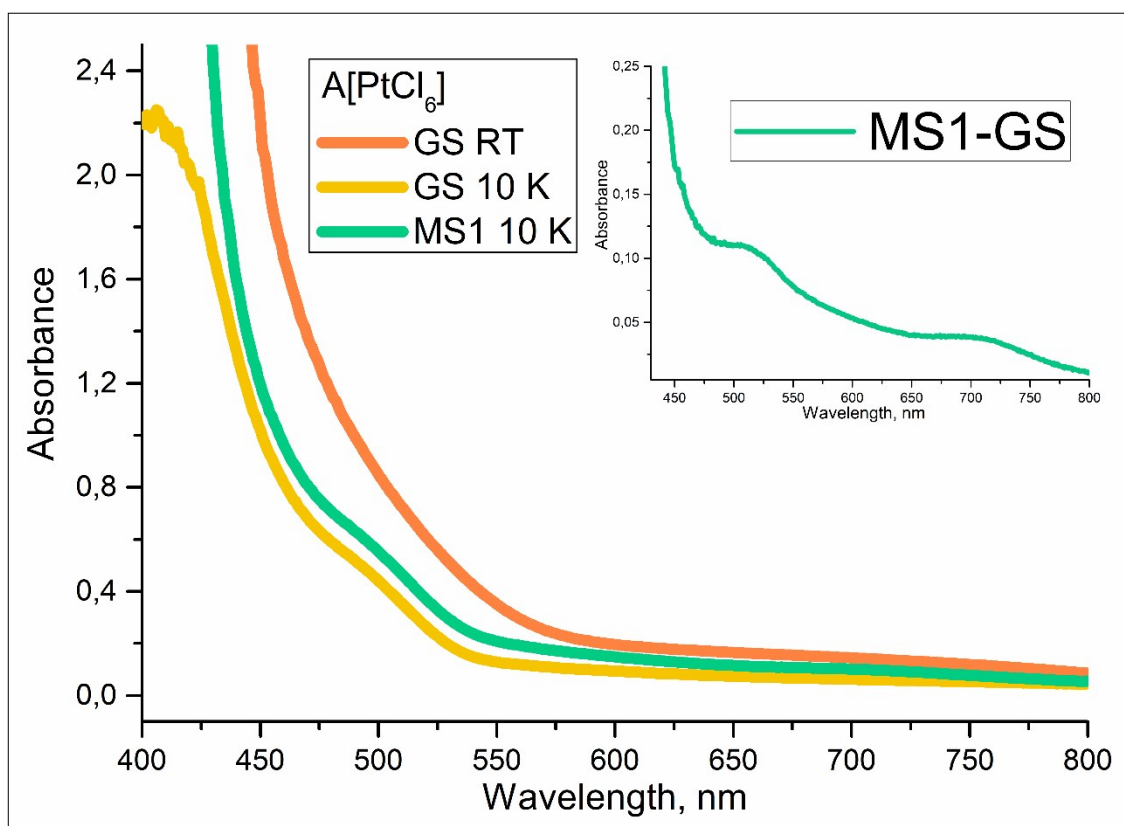

**Fig. S9.** UV/vis spectra of  $A[PtCl_6]$  in KBr at room temperature (orange), 10 K (yellow) and after MS1 generation at 10 K (green).



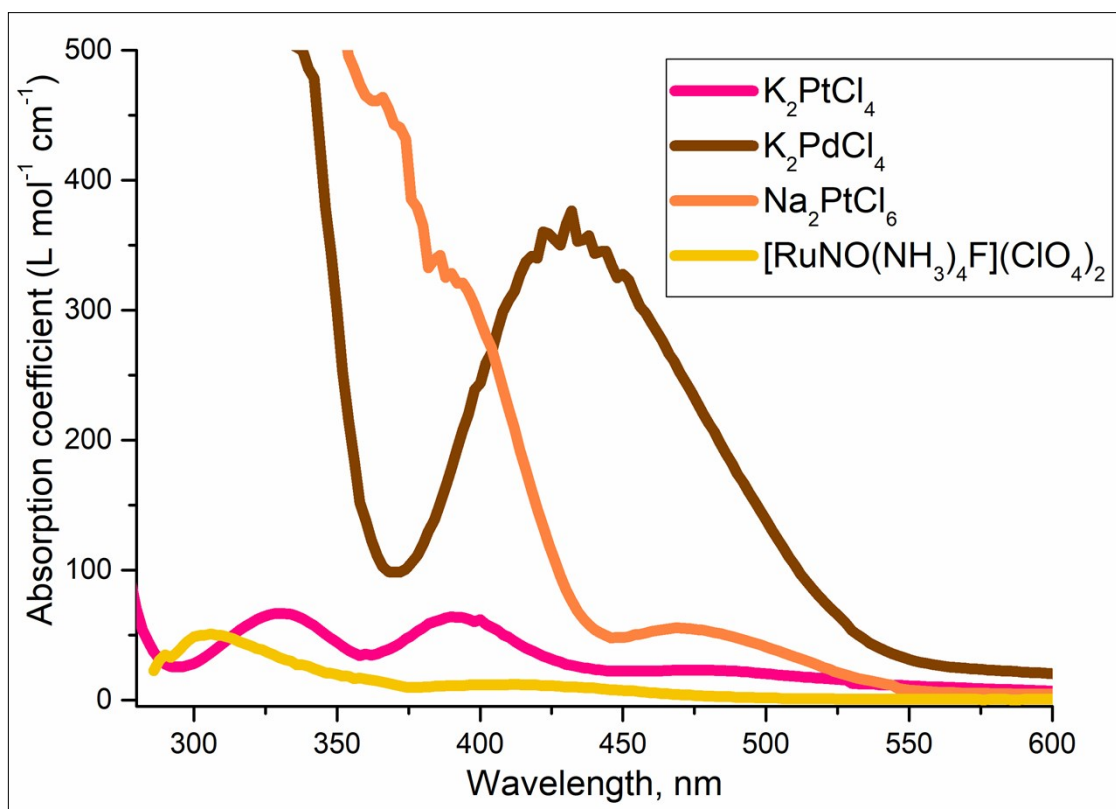

**Fig. S10.** UV/vis spectra of water solutions of K<sub>2</sub>PtCl<sub>4</sub> (pink), K<sub>2</sub>PdCl<sub>4</sub> (brown), Na<sub>2</sub>PtCl<sub>6</sub> (orange) and [RuNO(NH<sub>3</sub>)<sub>4</sub>F](ClO<sub>4</sub>)<sub>2</sub> (yellow).
